# Supplementary material for: 24-Epibrassinolide promotes NO3− and NH4+ ion flux rate and NRT1 gene expression in cucumber under suboptimal root zone temperature
Source: BMC Plant Biol. 2019 May 30;19:225. doi: 10.1186/s12870-019-1838-3 (PMC6543628; doi:10.1186/s12870-019-1838-3)
Supplement: Supplementary file 1 — Table S1. The list of specific primers for Quantitative Real-Time Polymerase Chain Reaction (qRT-PCR). (XLSX 10 kb) [file 12870_2019_1838_MOESM1_ESM.xlsx]

## Sheet: Sheet1
				Supplimentry Table S1	24-Epibrassinolide promotes NO3- and NH4+ ion flux rate and NRT1 gene expression in cucumber under suboptimal root zone temperature
				Gene name	Primer
				CsNRT1.1-F	GACAGGAACTATGCATTTGGGGAAT
				CsNRT1.1-R	GCGCAATGTGATGACGACTCTA
				CsNRT1.2A-F	ATGCAGTACAAGTACAGACC
				CsNRT1.2A-R	CCCATTTAATCCCATGCC
				CsNRT1.2B-F	TCAGCTGCTTTCAACAATAGG
				CsNRT1.2B-R	GCTTGTGTTTGAATTGGACTT
				CsNRT1.2C-F	ATTGTATCGGTTGTGAACCA
				CsNRT1.2C-R	AGGCCACTAAGAACACACATAA
				CsNRT1.3-F	CATCAGTACAAAGACCAGCATTA
				CsNRT1.3-R	GCAAATGTGTCCTTGAGTTC
				CsNRT1.4A-F	GAAAGCAGAGATTAACGGTTG
				CsNRT1.4A-R	TGGAAAGAAGGAAACATGTG
				CsNRT1.4B-F	CTTGGCTGAAGAGAAATGCTA
				CsNRT1.4B-R	AACTGGTAATACTTTATACATAAAGCATC
				CsNRT1.5A-F	ATATCGGCGACCGATAAC
				CsNRT1.5A-R	ACTACACTGGCAACTACAC
				CsNRT1.5B-F	GATGGGACTATTGATTGGCA
				CsNRT1.5B-R	CTTCCCACATATAACCTTGTAGA
				CsNRT1.5C-F	TTATGGAGATCACAAGGAAAGAAG
				CsNRT1.5C-R	CGGTACTATTGAAATGTCATCC
				CsNRT1.8-F	CGTTGTCTCTGCGGCGAA
				CsNRT1.8-R	GTTCACTCCTTGCTCTTTATCACTT
				CsNRT1.9-F	TTTACTACAAGGAGTTCCCTGA
				CsNRT1.9-R	CGATACCAAGAAATAGAAGTAATCCA
				CsNRT1.10-F	TGGGAAGATTCTTATGAAGTGC
				CsNRT1.10-R	CTCGTCAAATTTACACATTGGT
				RGCuACT-R	ATTTCCCGTTCGGCAGT
				RGCuACT-α-R	TACCAGGCTTGAGGACACC
